# Supplementary material for: Identification and Validation of a Potential Stemness-Associated Biomarker in Hepatocellular Carcinoma
Source: Hindawi journal article supplement (doi:10.1155/2022/1534593), 2022-07-11
Supplement: f1 [file 1534593.f1.zip]

Table S3. Clinicopathological characteristics of HCC patients from the TCGA, ICGC, and GEO cohorts.

| Characteristics          | TCGA cohort<br>(n=374) | ICGC cohort<br>(n=232) | GEO cohort<br>(n=221) |
|--------------------------|------------------------|------------------------|-----------------------|
| <b>Age(years)</b>        |                        |                        |                       |
| <65                      | 222                    | 83                     | 196                   |
| >=65                     | 152                    | 149                    | 25                    |
| <b>Gender</b>            |                        |                        |                       |
| Female                   | 121                    | 61                     | 30                    |
| Male                     | 253                    | 171                    | 191                   |
| <b>Vital Status</b>      |                        |                        |                       |
| Alive                    | 243                    | 189                    | 136                   |
| Dead                     | 130                    | 43                     | 85                    |
| Unknown                  | 1                      | 0                      | 0                     |
| <b>T</b>                 |                        |                        |                       |
| T1                       | 183                    | N/A                    | N/A                   |
| T2                       | 95                     | N/A                    | N/A                   |
| T3                       | 80                     | N/A                    | N/A                   |
| T4                       | 13                     | N/A                    | N/A                   |
| Unknown                  | 3                      | N/A                    | N/A                   |
| <b>N</b>                 |                        |                        |                       |
| N0                       | 254                    | N/A                    | N/A                   |
| N1                       | 4                      | N/A                    | N/A                   |
| Unknown                  | 116                    | N/A                    | N/A                   |
| <b>M</b>                 |                        |                        |                       |
| M0                       | 268                    | N/A                    | N/A                   |
| M1                       | 4                      | N/A                    | N/A                   |
| Unknown                  | 102                    | N/A                    | N/A                   |
| <b>Stage</b>             |                        |                        |                       |
| Stage I                  | 173                    | 36                     | 93                    |
| Stage II                 | 87                     | 105                    | 77                    |
| Stage III                | 85                     | 71                     | 49                    |
| Stage IV                 | 5                      | 19                     | 0                     |
| Unknown                  | 24                     | 0                      | 2                     |
| <b>Grade</b>             |                        |                        |                       |
| G1                       | 55                     | N/A                    | N/A                   |
| G2                       | 178                    | N/A                    | N/A                   |
| G3                       | 124                    | N/A                    | N/A                   |
| G4                       | 12                     | N/A                    | N/A                   |
| Unknown                  | 5                      | N/A                    | N/A                   |
| <b>Cancer Status</b>     |                        |                        |                       |
| Tumor Free               | 162                    | N/A                    | N/A                   |
| With Tumor               | 124                    | N/A                    | N/A                   |
| Unknown                  | 88                     | N/A                    | N/A                   |
| <b>Fetoprotein Value</b> |                        |                        |                       |
| <=25ug/L                 | 163                    | N/A                    | N/A                   |
| >25ug/L                  | 117                    | N/A                    | N/A                   |
| Unknown                  | 94                     | N/A                    | N/A                   |
| <b>Ishak Score</b>       |                        |                        |                       |
| 0                        | 75                     | N/A                    | N/A                   |
| 1\2                      | 31                     | N/A                    | N/A                   |
| 3\4                      | 28                     | N/A                    | N/A                   |
| 5                        | 9                      | N/A                    | N/A                   |

|                          |     |     |     |
|--------------------------|-----|-----|-----|
| 6                        | 72  | N/A | N/A |
| Unknown                  | 159 | N/A | N/A |
| <b>Vascular Invasion</b> |     |     |     |
| None                     | 208 | N/A | N/A |
| Micro                    | 94  | N/A | N/A |
| Macro                    | 16  | N/A | N/A |
| Unknown                  | 56  | N/A | N/A |
