# Supplementary material for: Identification and Validation of a Potential Stemness-Associated Biomarker in Hepatocellular Carcinoma
Source: Hindawi journal article supplement (doi:10.1155/2022/1534593), 2022-07-11
Supplement: f1 [file 1534593.f1.zip]

Table S4. 737 genes in blue module by WGCNA.

PEG10  
TRIM71  
PITX1  
CYP3A4  
IGF2BP1  
BEX2  
SLCO4C1  
UPK3A  
NPSR1-AS1  
MSI1  
GLRB  
POF1B  
RP11-476K15.1  
ZIC5  
TTC36  
ILDR1  
C6orf223  
IGF2BP3  
COCH  
NRCAM  
MEP1A  
GUCY1B2  
KCNK9  
NCAPD2P1  
LINC00992  
GPC5  
FOXN4  
ELOVL7  
SFN  
PRR15L  
C1orf106  
CYP8B1  
SUSD4  
LINC01224  
FOXQ1  
TAT  
CTSE  
EPO  
B4GALNT2  
PRAME  
GCNT3  
CCDC162P  
KIAA1244  
EPPK1  
CTSV  
GAL3ST1  
C1orf186  
SULT1C2  
LRCOL1  
PAQR5  
GPC3  
SYT8  
PYCR1  
SLC29A4  
BCAS1  
ADH4  
SLC2A5  
TERT  
C1QL1  
PNCK

SLC5A12  
PCLO  
FER1L6  
LINC01234  
RP11-118B18.2  
SALL4  
LINC01152  
GLYAT  
BMP8B  
HPD  
DMBT1  
TRAM1L1  
RP11-313J2.1  
SLC10A1  
CDCA7  
GLDN  
FMO1  
LINC00511  
FXVD3  
VIL1  
LYPD1  
FOXJ1  
FOLR1  
STMND1  
CYP19A1  
UGT8  
CD300LG  
SALL2  
CD24  
ADH1C  
MAEL  
RP11-244M2.1  
SGCE  
CLGN  
LHFPL3-AS2  
SMPDL3B  
RP5-1120P11.1  
C15orf48  
GYLTL1B  
EVPL  
PACSIN1  
COL28A1  
KB-1460A1.1  
RP11-57A1.1  
LYPD6  
NEB  
RP11-108M9.3  
RP11-7M8.2  
PTPN20A  
ZNF239  
RP11-875O11.3  
NSUN7  
TFAP2A-AS1  
ANXA13  
PCK1  
RP4-763G1.2  
SPHK1  
HERC2P3  
ZIC2  
TCL6  
LINC00944

RP11-187E13.1  
SMC1B  
SLC22A15  
IGF2BP2  
TRNP1  
CFHR4  
C6orf183  
C3orf14  
CYP26B1  
PKIB  
EGLN3  
IGSF1  
GSDMC  
MYBL2  
MMP1  
DUXAP10  
STOX1  
FER1L4  
ABCA8  
SIX4  
MYO1A  
DQX1  
CDH8  
CCDC155  
SPATA17  
PPP1R14D  
ZPLD1  
BFSP2  
C12orf56  
FAM183A  
ERC2  
HIST3H2BB  
ZNF695  
MCCD1  
XXyac-YM21GA2.7  
CKMT1A  
RP11-350E12.4  
ERVMER34-1  
RP11-567G11.1  
CECR7  
TCAM1P  
HOXA11-AS  
RP11-742B18.1  
RP11-618I10.2  
RP11-501C14.7  
RP11-497G19.1  
TRAV30  
CTD-2555C10.3  
RP11-352D13.6  
RP1-118J21.25  
RP11-353N14.2  
RP11-38M8.1  
IBSP  
LINC01587  
PHEX  
EYA1  
DLX4  
HAVCR1  
SLC7A10  
MYEF2  
MIOX

FAM64A  
FIBCD1  
FIRRE  
HMGA2  
EFHC2  
PDIA2  
DCHS2  
RP11-132N15.1  
AC093375.1  
RP11-73M7.1  
RP1-45C12.1  
RP11-227H15.5  
RP11-829H16.3  
CYP4F23P  
TMEM145  
PPM1E  
AFP  
SOBP  
TMEM246  
TMED3  
TRIM31  
RP11-422N16.3  
FABP4  
LAMA5-AS1  
CD109  
ASNS  
ESYT3  
LINC00238  
C5orf30  
MCOLN3  
SULT1C2P1  
RIPPLY3  
LEFTY1  
ALG1L  
ADH1B  
OTX1  
HAGLR  
ISL2  
KSR2  
CLDN18  
SPTSSB  
RP11-449J21.5  
TMEM100  
NRSN2  
CNKSR1  
ZNF883  
FUT2  
ATOH8  
RP11-356M20.1  
RNF157  
ADAM22  
SLC27A5  
NEURL3  
ATP6V0D2  
MFI2  
SLITRK5  
RP11-528A4.2  
LINC01296  
LRRC37A6P  
GNAZ  
MKRN2OS

AQP9  
DUSP9  
RP11-16E12.2  
MCF2L2  
B3GNT5  
ZNF711  
RIBC2  
TMIE  
C12orf75  
NAP1L4P1  
TFAP2A  
BEND3P1  
VASH2  
DRP2  
PLCH1  
ANKRD18CP  
TAC3  
FAM87A  
RP11-452D2.2  
RP11-616K6.1  
RP11-496I2.5  
AC241377.2  
DAGLA  
INPP5J  
KIF18B  
SLC38A1  
RTKN2  
NUP62CL  
ZYG11A  
KCNN1  
APOBEC3B  
LINC01485  
TBC1D30  
CTC-260E6.4  
E2F7  
GPX7  
EIF5A2  
RP11-498P14.5  
IGSF3  
FADS2  
PRR36  
TICRR  
RP11-424C20.2  
CTD-2510F5.4  
AL589743.1  
TTLL7  
FHAD1  
TP73  
SPATC1L  
TOP2A  
ETV1  
DEPDC1B  
DDR1  
MDK  
PLBD1-AS1  
ABCC4  
ZNF300  
COL9A2  
IQCD  
NANOS1  
PLK1

KCNJ11  
UHRF1  
CLSPN  
BUB1B  
CXXC4  
GTSE1  
DNAJC6  
MNS1  
KIF15  
AMH  
TNNT1  
ELOVL3  
DNAI1  
ACPT  
PLEKHS1  
KIF5A  
DNAH3  
MMP10  
CASKIN1  
RNF186  
C1QL4  
LA16c-60H5.7  
PSMD10P2  
SLC9A7P1  
AC118754.4  
AL133493.2  
RP11-564D11.3  
RP11-459D22.1  
LL22NC03-N14H11.1  
RP11-165A20.3  
LINC00189  
HP  
ZNF93  
CALCR  
KCNC1  
MCM10  
BAIAP2L2  
RP11-351J23.1  
DEPDC1  
CDC20  
ACOT11  
HPR  
HOMER1  
E2F8  
COLCA2  
TTK  
RP11-381N20.1  
RP11-439C15.4  
RP11-146E13.5  
RAD54L  
ITPKA  
PIK3CD-AS2  
KIF23  
KIF20A  
UGT1A7  
POLQ  
PRR19  
FOXO1  
CENPF  
ZSWIM5  
SLC1A5

SLC6A9  
LINC00654  
CDKN2A  
ADAMTS6  
FBXO41  
SH2D5  
RP11-34P13.16  
KB-1742H10.3  
DMC1  
LRRC1  
HKDC1  
TROAP  
AURKB  
DFNA5  
BIRC5  
CDCA2  
BCL2L14  
KCTD17  
PFN2  
SHOX2  
LRRC66  
RP11-89H19.2  
NEIL3  
SKA1  
KIF2C  
AGPAT4  
KIF18A  
CEP55  
ANLN  
CELSR3  
CCNE1  
CENPA  
GINS1  
AKR7A3  
NEK10  
AC015849.16  
ADM2  
PHGDH  
SRSF12  
TLDC2  
STRIP2  
MPP2  
SBK1  
XRCC2  
GFRA3  
CNGB3  
SIX2  
TTLL6  
PIFO  
ACBD7  
GRIN1  
CDHR4  
LINC00943  
MALRD1  
CCNI2  
CDKN2A-AS1  
AC007461.2  
SLC25A5P5  
RP11-165F24.3  
HSPA8P8  
RP11-49O14.2

RP11-132N15.2  
PTPRG-AS1  
CTC-458A3.1  
RP11-120K18.2  
RP11-973F15.2  
RP11-336K24.12  
RIMBP3  
HIST1H2BF  
CTAGE4  
LINC00479  
CPHL1P  
RP11-417L19.2  
MKI67  
SHCBP1  
NUF2  
ZC3H12B  
ROBO1  
BUB1  
PIF1  
DNASE1L3  
CCNB2  
FAM72C  
RNFT2  
KPNA7  
TOB2P1  
CDT1  
NEURL1  
CKAP2L  
ESM1  
ADORA2B  
UBE2C  
MIR210HG  
HCG16  
RNU6-850P  
DNM1  
STK26  
LCAT  
ZNF738  
CTD-2561J22.5  
NCAPG  
ZNF296  
DLGAP5  
OR2B6  
REG4  
FAM57B  
LRRFIP1P1  
PRR11  
ESCO2  
PLXNC1  
PBK  
CENPM  
COLCA1  
KIFC1  
CDK1  
BLM  
CENPK  
SGOL1  
MELK  
TET1  
ERCC6L  
KIAA1524



KIAA1324  
DTL  
RP1-152L7.5  
ZC2HC1A  
CYP2W1  
KIAA1377  
PEBP4  
FAM227A  
ZNF385C  
FAM72B  
HMSD  
RP11-79N23.1  
RP11-496H1.1  
CTC-378H22.2  
RP11-963H4.3  
CSPG5  
VEGFB  
KIF4A  
SLC35G2  
NCAPH  
CAPN12  
HJURP  
ECT2  
TPX2  
SNHG4  
CENPE  
E2F1  
CTB-147N14.6  
CHAF1B  
CIB2  
SPOCD1  
TRIP13  
SAPCD2  
GPRIN1  
ASPM  
USP51  
KREMEN2  
TRIM36  
RP11-398C13.2  
ATP2A1-AS1  
HELLS  
E2F2  
CDC6  
CDCA8  
ESPL1  
ASPDH  
RP11-923I11.6  
RDM1  
GSG2  
RNF5P1  
CDC45  
CDC25A  
DUSP15  
BCYRN1  
ENTPD2  
MPP3  
GABRQ  
ASF1B  
KIF14  
CMB9-22P13.1  
DAND5

TEX19  
AC010136.2  
RP11-495P10.10  
ZNF878  
CTD-2529O21.1  
RP11-353N14.4  
RP11-382D12.2  
TSSK5P  
FIGNL2  
DHDH  
GRIN3B  
REEP2  
SCAMP5  
SRC  
ZNF233  
RTN2  
PKMYT1  
HMMR  
RP1-8B1.4  
DIAPH3  
PLCB1  
RSPH14  
C7orf31  
SLC2A1  
SLC44A4  
SKA3  
NEK2  
CDCA7L  
KCP  
ANKS6  
C16orf59  
FADS1  
TNFRSF11A  
FBXO43  
MTFR2  
FAM81A  
DPY19L2P2  
FAM225A  
LINC01091  
CCDC64  
CRHR1-IT1  
BMF  
ARID3A  
ENPP2  
CCNA2  
BEST4  
CDKN2B-AS1  
RP11-351J23.2  
MAFG-AS1  
SH2D6  
RP11-1008C21.2  
FIGN  
CENPI  
ASRGL1  
AC009005.2  
FAM46B  
SAMD13  
KIF12  
RP11-486A14.1  
WBP5  
DSG2

ZNF724P  
C6  
MCM2  
PRC1  
CDCA5  
SCG5  
LINC01268  
ORC1  
GALNT15  
ARNTL2  
CTD-2589H19.6  
MESP2  
LRP12  
ARHGAP11A  
KIF11  
FAM182B  
SAPCD1  
QPCT  
MYB  
ORC6  
EME1  
HIST1H3B  
RAD51  
PRTFDC1  
PLEKHG6  
NGFRAP1  
CYP27B1  
RAD51AP1  
EXO1  
PAQR4  
RHOF  
RNF39  
TTC34  
NPAS1  
PTTG1  
MPP7  
TIGD3  
FAM72D  
ROCK1P1  
C3orf67  
TRPC1  
LYPD3  
RP5-858L17.1  
RP11-839D17.3  
KIAA0101  
PLP2  
RMI2  
FAM111B  
MLK4  
GINS4  
RPSAP58  
CHRNA5  
SPC25  
G6PD  
CCNB1  
LMNB1  
WDR62  
LINC00299  
NDC80  
OSBP2  
NT5DC2

ENPP6  
RNASE2  
CDKN3  
KIF7  
ZWINT  
TYMS  
IQGAP3  
RP11-863K10.7  
FANCD2  
ZNF192P1  
AIFM3  
RP11-158L12.4  
FOXD2  
CTC-471F3.5  
KLHL7-AS1  
FOXD2-AS1  
KRBA1  
TMC7  
ARHGAP11B  
STK31  
LHX4  
CDCA3  
FZD6  
MAGEE1  
GPR19  
HIST2H2BF  
ARHGEF19  
APOC4  
RP11-20I20.4  
RP11-98G7.1  
BNIP3P11  
STIL  
BRIP1  
RP1-193H18.2  
MSH5  
WDR76  
TRIM67  
TCEAL8  
KITLG  
ATP8B2  
ASB9  
KNTC1  
OIP5  
AGBL2  
MFI2-AS1  
ZNF594  
GAS2L3  
TRIM59  
SMC4  
KCNMB3  
SQLE  
RRM2  
BCAS4  
AP001469.9  
MAP2K6  
PAFAH1B3  
ALDOC  
PARPBP  
CNTNAP1  
PRR7  
CDC25C

CENPW  
CIT  
CCDC78  
TCF19  
CBX2  
MTL5
