# Supplementary material for: Identification and Validation of a Potential Stemness-Associated Biomarker in Hepatocellular Carcinoma
Source: Hindawi journal article supplement (doi:10.1155/2022/1534593), 2022-07-11
Supplement: f1 [file 1534593.f1.zip]

Table S1. The mRNAsi score of HCC patients in TCGA database.

| ID               | mRNAsi      | EREG-mRNAsi |
|------------------|-------------|-------------|
| TCGA.2V.A95S.01A | 0.402031387 | 0.6270183   |
| TCGA.2Y.A9GS.01A | 0.44229679  | 0.6181242   |
| TCGA.2Y.A9GT.01A | 0.300767799 | 0.515315    |
| TCGA.2Y.A9GU.01A | 0.37526763  | 0.4058798   |
| TCGA.2Y.A9GV.01A | 0.310258058 | 0.5519246   |
| TCGA.2Y.A9GW.01A | 0.325594706 | 0.6265033   |
| TCGA.2Y.A9GX.01A | 0.256914765 | 0.5855435   |
| TCGA.2Y.A9GY.01A | 0.467310563 | 0.7211716   |
| TCGA.2Y.A9GZ.01A | 0.398377177 | 0.6308551   |
| TCGA.2Y.A9H0.01A | 0.512638883 | 0.5212234   |
| TCGA.2Y.A9H1.01A | 0.428315371 | 0.6380647   |
| TCGA.2Y.A9H2.01A | 0.373167971 | 0.4853749   |
| TCGA.2Y.A9H3.01A | 0.343728269 | 0.4747591   |
| TCGA.2Y.A9H4.01A | 0.444588211 | 0.7182007   |
| TCGA.2Y.A9H5.01A | 0.302689004 | 0.589496    |
| TCGA.2Y.A9H6.01A | 0.272552931 | 0.4731827   |
| TCGA.2Y.A9H7.01A | 0.415275223 | 0.5275674   |
| TCGA.2Y.A9H8.01A | 0.434944669 | 0.4750669   |
| TCGA.2Y.A9H9.01A | 0.390972704 | 0.4971089   |
| TCGA.2Y.A9HA.01A | 0.410491047 | 0.5850479   |
| TCGA.2Y.A9HB.01A | 0.378925631 | 0.525902    |
| TCGA.3K.AAZ8.01A | 0.421625445 | 0.6889969   |
| TCGA.4R.AA8I.01A | 0.394800838 | 0.4816988   |
| TCGA.5C.A9VG.01A | 0.42189577  | 0.6075373   |
| TCGA.5C.A9VH.01A | 0.301258148 | 0.5661142   |
| TCGA.5C.AAPD.01A | 0.420491015 | 0.6870335   |
| TCGA.5R.AA1C.01A | 0.422825083 | 0.6930022   |
| TCGA.5R.AA1D.01A | 0.214527172 | 0.721845    |
| TCGA.5R.AAAM.01A | 0.273470066 | 0.7313958   |
| TCGA.BC.4072.01B | 0.337306104 | 0.7053867   |
| TCGA.BC.4073.01B | 0.378525437 | 0.7119936   |
| TCGA.BC.A10Q.01A | 0.301563782 | 0.4278185   |
| TCGA.BC.A10R.01A | 0.288976455 | 0.4925389   |
| TCGA.BC.A10S.01A | 0.30972238  | 0.5948244   |
| TCGA.BC.A10T.01A | 0.359388181 | 0.7443341   |
| TCGA.BC.A10U.01A | 0.381205381 | 0.5792695   |
| TCGA.BC.A10W.01A | 0.45921262  | 0.6416361   |
| TCGA.BC.A10X.01A | 0.27907277  | 0.565045    |
| TCGA.BC.A10Y.01A | 0.462289616 | 0.6107905   |
| TCGA.BC.A10Z.01A | 0.46646496  | 0.5961774   |
| TCGA.BC.A110.01A | 0.249282971 | 0.6204828   |
| TCGA.BC.A112.01A | 0.401500344 | 0.6114923   |
| TCGA.BC.A216.01A | 0.417796017 | 0.5478731   |
| TCGA.BC.A217.01A | 0.472463511 | 0.7081109   |
| TCGA.BC.A3KF.01A | 0.402669323 | 0.5297258   |
| TCGA.BC.A3KG.01A | 0.454465593 | 0.5910141   |

|                  |             |           |
|------------------|-------------|-----------|
| TCGA.BC.A5W4.01A | 0.441268809 | 0.6565135 |
| TCGA.BC.A69H.01A | 0.462115638 | 0.8174163 |
| TCGA.BC.A69L.01A | 0.320756265 | 0.6415133 |
| TCGA.BC.A8YO.01A | 0.450591479 | 0.536462  |
| TCGA.BD.A2L6.01A | 0.4222915   | 0.6058226 |
| TCGA.BD.A3EP.01A | 0.292602758 | 0.6101177 |
| TCGA.BW.A5NO.01A | 0.426322699 | 0.652451  |
| TCGA.BW.A5NP.01A | 0.423895173 | 0.6064979 |
| TCGA.BW.A5NQ.01A | 0.538778668 | 0.7049025 |
| TCGA.CC.5258.01A | 0.444544107 | 0.6835728 |
| TCGA.CC.5259.01A | 0.418498753 | 0.6450539 |
| TCGA.CC.5260.01A | 0.305091563 | 0.5574592 |
| TCGA.CC.5261.01A | 0.323826036 | 0.6161455 |
| TCGA.CC.5262.01A | 0.355584388 | 0.7492907 |
| TCGA.CC.5263.01A | 0.412725318 | 0.5921995 |
| TCGA.CC.5264.01A | 0.455407636 | 0.5427846 |
| TCGA.CC.A123.01A | 0.457048608 | 0.7189743 |
| TCGA.CC.A1HT.01A | 0.398298264 | 0.6981167 |
| TCGA.CC.A3M9.01A | 0.391949986 | 0.5864358 |
| TCGA.CC.A3MA.01A | 0.325286264 | 0.73494   |
| TCGA.CC.A3MB.01A | 0.408020796 | 0.6075951 |
| TCGA.CC.A3MC.01A | 0.405648671 | 0.6258257 |
| TCGA.CC.A5UC.01A | 0.426954481 | 0.6934122 |
| TCGA.CC.A5UD.01A | 0.359148816 | 0.7769623 |
| TCGA.CC.A5UE.01A | 0.468794533 | 0.64143   |
| TCGA.CC.A7IE.01A | 0.417866953 | 0.5686571 |
| TCGA.CC.A7IF.01A | 0.400887722 | 0.5830157 |
| TCGA.CC.A7IG.01A | 0.422419314 | 0.6688389 |
| TCGA.CC.A7IH.01A | 0.330009293 | 0.6752528 |
| TCGA.CC.A7IL.01A | 0.520585976 | 0.6980796 |
| TCGA.CC.A7IJ.01A | 0.343349    | 0.5819262 |
| TCGA.CC.A7IK.01A | 0.428169128 | 0.5937163 |
| TCGA.CC.A7IL.01A | 0.461128786 | 0.7862397 |
| TCGA.CC.A8HS.01A | 0.415075711 | 0.5034755 |
| TCGA.CC.A8HT.01A | 0.497121163 | 0.6664876 |
| TCGA.CC.A8HU.01A | 0.452671909 | 0.4793852 |
| TCGA.CC.A8HV.01A | 0.393709008 | 0.6067752 |
| TCGA.CC.A9FS.01A | 0.422264306 | 0.5072979 |
| TCGA.CC.A9FU.01A | 0.473129993 | 0.6025308 |
| TCGA.CC.A9FV.01A | 0.195650393 | 0.6289958 |
| TCGA.CC.A9FW.01A | 0.381859416 | 0.5764036 |
| TCGA.DD.A113.01A | 0.405738975 | 0.5572528 |
| TCGA.DD.A114.01A | 0.361393826 | 0.5068985 |
| TCGA.DD.A115.01A | 0.376120625 | 0.4887181 |
| TCGA.DD.A116.01A | 0.384494474 | 0.6435401 |
| TCGA.DD.A118.01A | 0.374641228 | 0.5155321 |
| TCGA.DD.A119.01A | 0.393059698 | 0.6089842 |
| TCGA.DD.A11A.01A | 0.426664522 | 0.5287009 |

|                  |             |           |
|------------------|-------------|-----------|
| TCGA.DD.A11B.01A | 0.380866606 | 0.5456799 |
| TCGA.DD.A11C.01A | 0.386526604 | 0.549391  |
| TCGA.DD.A11D.01A | 0.328945871 | 0.6010198 |
| TCGA.DD.A1EA.01A | 0.418243542 | 0.659767  |
| TCGA.DD.A1EB.01A | 0.37346333  | 0.5736277 |
| TCGA.DD.A1EC.01A | 0.380408465 | 0.5402993 |
| TCGA.DD.A1ED.01A | 0.276780286 | 0.5595666 |
| TCGA.DD.A1EE.01A | 0.409259746 | 0.6166049 |
| TCGA.DD.A1EF.01A | 0.374939783 | 0.4789254 |
| TCGA.DD.A1EG.01A | 0.400450907 | 0.6911694 |
| TCGA.DD.A1EH.01A | 0.36532964  | 0.529474  |
| TCGA.DD.A1EL.01A | 0.310474787 | 0.6186306 |
| TCGA.DD.A1EJ.01A | 0.421237345 | 0.6028696 |
| TCGA.DD.A1EK.01A | 0.359057612 | 0.5867842 |
| TCGA.DD.A1EL.01A | 0.45898646  | 0.8080613 |
| TCGA.DD.A39V.01A | 0.412734927 | 0.6922034 |
| TCGA.DD.A39W.01A | 0.361751369 | 0.6708133 |
| TCGA.DD.A39X.01A | 0.420783488 | 0.6828031 |
| TCGA.DD.A39Y.01A | 0.491215697 | 0.678218  |
| TCGA.DD.A39Z.01A | 0.435935597 | 0.6085345 |
| TCGA.DD.A3A1.01A | 0.452212205 | 0.6754447 |
| TCGA.DD.A3A2.01A | 0.378894549 | 0.5479468 |
| TCGA.DD.A3A3.01A | 0.442435043 | 0.6842149 |
| TCGA.DD.A3A4.01A | 0.427227531 | 0.7337799 |
| TCGA.DD.A3A5.01A | 0.406669684 | 0.7152836 |
| TCGA.DD.A3A6.01A | 0.211989092 | 0.5367421 |
| TCGA.DD.A3A7.01A | 0.451230645 | 0.5708721 |
| TCGA.DD.A3A8.01A | 0.354039239 | 0.6432146 |
| TCGA.DD.A3A9.01A | 0.316245661 | 0.5598708 |
| TCGA.DD.A4NA.01A | 0.300081654 | 0.5181366 |
| TCGA.DD.A4NB.01A | 0.191298434 | 0.6183703 |
| TCGA.DD.A4ND.01A | 0.22975882  | 0.504921  |
| TCGA.DD.A4NE.01A | 0.389009516 | 0.5246918 |
| TCGA.DD.A4NF.01A | 0.326269311 | 0.5698548 |
| TCGA.DD.A4NG.01A | 0.359498268 | 0.6428035 |
| TCGA.DD.A4NH.01A | 0.343796561 | 0.5601602 |
| TCGA.DD.A4NI.01A | 0.304640072 | 0.5756534 |
| TCGA.DD.A4NJ.01A | 0.389383225 | 0.5140851 |
| TCGA.DD.A4NK.01A | 0.366395045 | 0.5367031 |
| TCGA.DD.A4NL.01A | 0.276101628 | 0.6070019 |
| TCGA.DD.A4NN.01A | 0.380719639 | 0.5826845 |
| TCGA.DD.A4NO.01A | 0.341850228 | 0.5902436 |
| TCGA.DD.A4NP.01A | 0.328091441 | 0.5928132 |
| TCGA.DD.A4NQ.01A | 0.425754415 | 0.6360607 |
| TCGA.DD.A4NR.01A | 0.40302257  | 0.6624471 |
| TCGA.DD.A4NS.01A | 0.167069581 | 0.5365024 |
| TCGA.DD.A4NV.01A | 0.291853992 | 0.5935596 |
| TCGA.DD.A73A.01A | 0.387148757 | 0.646046  |

|                  |             |           |
|------------------|-------------|-----------|
| TCGA.DD.A73B.01A | 0.464942752 | 0.5539556 |
| TCGA.DD.A73C.01A | 0.354957334 | 0.5046693 |
| TCGA.DD.A73D.01A | 0.46390155  | 0.6870656 |
| TCGA.DD.A73E.01A | 0.350252768 | 0.5953816 |
| TCGA.DD.A73F.01A | 0.429181289 | 0.6407559 |
| TCGA.DD.A73G.01A | 0.417477561 | 0.6261116 |
| TCGA.DD.AA3A.01A | 0.377334731 | 0.4208524 |
| TCGA.DD.AAC8.01A | 0.369215218 | 0.6849967 |
| TCGA.DD.AAC9.01A | 0.336896346 | 0.7191775 |
| TCGA.DD.AACA.01A | 0.366490783 | 0.679449  |
| TCGA.DD.AACB.01A | 0.416731896 | 0.7240275 |
| TCGA.DD.AACC.01A | 0.381311145 | 0.6730823 |
| TCGA.DD.AACD.01A | 0.43447763  | 0.6768644 |
| TCGA.DD.AACE.01A | 0.369165049 | 0.5589356 |
| TCGA.DD.AACF.01A | 0.459436425 | 0.5406837 |
| TCGA.DD.AACG.01A | 0.526861399 | 0.7025845 |
| TCGA.DD.AACH.01A | 0.392067191 | 0.5176557 |
| TCGA.DD.AACI.01A | 0.399266162 | 0.5968356 |
| TCGA.DD.AACJ.01A | 0.455668992 | 0.639425  |
| TCGA.DD.AACK.01A | 0.413389067 | 0.6653049 |
| TCGA.DD.AACL.01A | 0.478640804 | 0.6334648 |
| TCGA.DD.AACN.01A | 0.292954013 | 0.5680099 |
| TCGA.DD.AACO.01A | 0.438940164 | 0.5672531 |
| TCGA.DD.AACP.01A | 0.475996959 | 0.6637976 |
| TCGA.DD.AACQ.01A | 0.407147672 | 0.4749463 |
| TCGA.DD.AACS.01A | 0.423782906 | 0.5554683 |
| TCGA.DD.AACT.01A | 0.346282769 | 0.722242  |
| TCGA.DD.AACU.01A | 0.358327248 | 0.667004  |
| TCGA.DD.AACV.01A | 0.496065375 | 0.5395985 |
| TCGA.DD.AACW.01A | 0.439320813 | 0.7078076 |
| TCGA.DD.AACX.01A | 0.438482767 | 0.6015167 |
| TCGA.DD.AACY.01A | 0.375078605 | 0.5606947 |
| TCGA.DD.AACZ.01A | 0.456028815 | 0.66803   |
| TCGA.DD.AAD0.01A | 0.41558194  | 0.6302246 |
| TCGA.DD.AAD1.01A | 0.252927096 | 0.5993607 |
| TCGA.DD.AAD2.01A | 0.317213083 | 0.6396936 |
| TCGA.DD.AAD3.01A | 0.271081519 | 0.6349571 |
| TCGA.DD.AAD5.01A | 0.415938821 | 0.7088233 |
| TCGA.DD.AAD6.01A | 0.48611698  | 0.5261061 |
| TCGA.DD.AAD8.01A | 0.410427912 | 0.5414179 |
| TCGA.DD.AADA.01A | 0.309994627 | 0.5375884 |
| TCGA.DD.AADB.01A | 0.435940228 | 0.6659571 |
| TCGA.DD.AADC.01A | 0.441300902 | 0.6985257 |
| TCGA.DD.AADD.01A | 0.482728088 | 0.5956693 |
| TCGA.DD.AADF.01A | 0.480083897 | 0.5578276 |
| TCGA.DD.AADG.01A | 0.370284914 | 0.7094744 |
| TCGA.DD.AADI.01A | 0.351242839 | 0.5950415 |
| TCGA.DD.AADJ.01A | 0.390220053 | 0.648143  |

|                  |             |           |
|------------------|-------------|-----------|
| TCGA.DD.AADK.01A | 0.341677466 | 0.5882902 |
| TCGA.DD.AADL.01A | 0.420094241 | 0.6273474 |
| TCGA.DD.AADM.01A | 0.443701183 | 0.7236908 |
| TCGA.DD.AADN.01A | 0.564322993 | 0.7646809 |
| TCGA.DD.AADO.01A | 0.47116611  | 0.7124268 |
| TCGA.DD.AADP.01A | 0.366347798 | 0.4696046 |
| TCGA.DD.AADQ.01A | 0.445425878 | 0.6153075 |
| TCGA.DD.AADR.01A | 0.495596604 | 0.7024195 |
| TCGA.DD.AADS.01A | 0.438865734 | 0.6763277 |
| TCGA.DD.AADU.01A | 0.380491143 | 0.6394853 |
| TCGA.DD.AADV.01A | 0.38310278  | 0.5389126 |
| TCGA.DD.AADW.01A | 0.340946814 | 0.4823017 |
| TCGA.DD.AADY.01A | 0.397050583 | 0.5577807 |
| TCGA.DD.AAE0.01A | 0.392650824 | 0.6220177 |
| TCGA.DD.AAE1.01A | 0.412693337 | 0.5842323 |
| TCGA.DD.AAE2.01A | 0.387491538 | 0.4962874 |
| TCGA.DD.AAE3.01A | 0.354168558 | 0.7340942 |
| TCGA.DD.AAE4.01A | 0.441971883 | 0.709927  |
| TCGA.DD.AAE6.01A | 0.514440989 | 0.5143474 |
| TCGA.DD.AAE7.01A | 0.310360147 | 0.688587  |
| TCGA.DD.AAE9.01A | 0.397604103 | 0.6424538 |
| TCGA.DD.AAEA.01A | 0.440954402 | 0.5911455 |
| TCGA.DD.AAEB.01A | 0.367846079 | 0.6457544 |
| TCGA.DD.AAED.01A | 0.420746769 | 0.5253835 |
| TCGA.DD.AAEE.01A | 0.400954119 | 0.5825011 |
| TCGA.DD.AAEG.01A | 0.399662386 | 0.6563217 |
| TCGA.DD.AAEH.01A | 0.393716179 | 0.5954165 |
| TCGA.DD.AAEI.01A | 0.463445545 | 0.6577051 |
| TCGA.DD.AAEK.01A | 0.325496775 | 0.5985998 |
| TCGA.DD.AAVP.01A | 0.374294476 | 0.5808224 |
| TCGA.DD.AAVQ.01A | 0.376290822 | 0.6675618 |
| TCGA.DD.AAVR.01A | 0.320553409 | 0.6153605 |
| TCGA.DD.AAVS.01A | 0.375798816 | 0.6970518 |
| TCGA.DD.AAVU.01A | 0.488229727 | 0.6810627 |
| TCGA.DD.AAVV.01A | 0.328084959 | 0.6467004 |
| TCGA.DD.AAVW.01A | 0.272509041 | 0.5897505 |
| TCGA.DD.AAVX.01A | 0.383138242 | 0.657738  |
| TCGA.DD.AAVY.01A | 0.421611602 | 0.6699441 |
| TCGA.DD.AAVZ.01A | 0.404742976 | 0.6505097 |
| TCGA.DD.AAW0.01A | 0.323632201 | 0.6427564 |
| TCGA.DD.AAW1.01A | 0.348154144 | 0.5784483 |
| TCGA.DD.AAW2.01A | 0.379845672 | 0.6158622 |
| TCGA.DD.AAW3.01A | 0.394061288 | 0.6046867 |
| TCGA.ED.A459.01A | 0.420212678 | 0.5500208 |
| TCGA.ED.A4XI.01A | 0.267618652 | 0.5891717 |
| TCGA.ED.A5KG.01A | 0.322490991 | 0.5702782 |
| TCGA.ED.A627.01A | 0.20823974  | 0.5600396 |
| TCGA.ED.A66X.01A | 0.344243717 | 0.6748066 |

|                  |             |           |
|------------------|-------------|-----------|
| TCGA.ED.A66Y.01A | 0.356780008 | 0.4611744 |
| TCGA.ED.A7PX.01A | 0.3480764   | 0.675495  |
| TCGA.ED.A7PY.01A | 0.385130964 | 0.6002011 |
| TCGA.ED.A7PZ.01A | 0.438983413 | 0.6534058 |
| TCGA.ED.A7XO.01A | 0.377698271 | 0.5398758 |
| TCGA.ED.A7XP.01A | 0.352233507 | 0.621656  |
| TCGA.ED.A82E.01A | 0.289304277 | 0.6310721 |
| TCGA.ED.A8O5.01A | 0.364398553 | 0.5141574 |
| TCGA.ED.A8O6.01A | 0.403046831 | 0.636233  |
| TCGA.ED.A97K.01A | 0.260007756 | 0.6344966 |
| TCGA.EP.A12J.01A | 0.378368901 | 0.597646  |
| TCGA.EP.A26S.01A | 0.377926304 | 0.6622521 |
| TCGA.EP.A2KA.01A | 0.406398211 | 0.7298248 |
| TCGA.EP.A2KB.01A | 0.38200201  | 0.5693096 |
| TCGA.EP.A2KC.01A | 0.352516456 | 0.6204743 |
| TCGA.EP.A3JL.01A | 0.395250219 | 0.6394185 |
| TCGA.EP.A3RK.01A | 0.417863733 | 0.6877218 |
| TCGA.ES.A2HS.01A | 0.370900958 | 0.5730798 |
| TCGA.ES.A2HT.01A | 0.38717631  | 0.6969944 |
| TCGA.FV.A23B.01A | 0.373810832 | 0.5441806 |
| TCGA.FV.A2QQ.01A | 0.40145493  | 0.6741314 |
| TCGA.FV.A2QR.01A | 0.322481292 | 0.6715117 |
| TCGA.FV.A3I0.01A | 0.254598306 | 0.3690733 |
| TCGA.FV.A3I1.01A | 0.37148863  | 0.6119071 |
| TCGA.FV.A3R2.01A | 0.434427591 | 0.6503047 |
| TCGA.FV.A3R3.01A | 0.228858993 | 0.6473625 |
| TCGA.FV.A495.01A | 0.38086704  | 0.5933076 |
| TCGA.FV.A496.01A | 0.375096533 | 0.5191962 |
| TCGA.FV.A4ZP.01A | 0.480008573 | 0.8262163 |
| TCGA.FV.A4ZQ.01A | 0.46372555  | 0.6660887 |
| TCGA.G3.A25S.01A | 0.497042761 | 0.6202899 |
| TCGA.G3.A25T.01A | 0.334060683 | 0.4504548 |
| TCGA.G3.A25U.01A | 0.4671218   | 0.7081591 |
| TCGA.G3.A25V.01A | 0.306916374 | 0.5753412 |
| TCGA.G3.A25X.01A | 0.368099641 | 0.6462773 |
| TCGA.G3.A25Y.01A | 0.336551226 | 0.701083  |
| TCGA.G3.A25Z.01A | 0.394260316 | 0.6992946 |
| TCGA.G3.A3CH.01A | 0.372589388 | 0.6282046 |
| TCGA.G3.A3CI.01A | 0.31684894  | 0.6819198 |
| TCGA.G3.A3CJ.01A | 0.397076959 | 0.7018962 |
| TCGA.G3.A3CK.01A | 0.390696029 | 0.6167013 |
| TCGA.G3.A5SI.01A | 0.465125197 | 0.5089257 |
| TCGA.G3.A5SJ.01A | 0.339752124 | 0.5700464 |
| TCGA.G3.A5SK.01A | 0.337120006 | 0.4282319 |
| TCGA.G3.A5SL.01A | 0.363978336 | 0.711655  |
| TCGA.G3.A5SM.01A | 0.341561119 | 0.5589423 |
| TCGA.G3.A6UC.01A | 0.398493053 | 0.6518087 |
| TCGA.G3.A7M5.01A | 0.445357284 | 0.6343956 |

|                  |             |           |
|------------------|-------------|-----------|
| TCGA.G3.A7M6.01A | 0.270556147 | 0.4926731 |
| TCGA.G3.A7M7.01A | 0.387498554 | 0.697945  |
| TCGA.G3.A7M8.01A | 0.337296988 | 0.6095244 |
| TCGA.G3.A7M9.01A | 0.465847273 | 0.598513  |
| TCGA.G3.AAUZ.01A | 0.412786107 | 0.650547  |
| TCGA.G3.AAV0.01A | 0.374232871 | 0.4695443 |
| TCGA.G3.AAV1.01A | 0.389031761 | 0.6412009 |
| TCGA.G3.AAV2.01A | 0.343080466 | 0.539451  |
| TCGA.G3.AAV3.01A | 0.357436651 | 0.5964427 |
| TCGA.G3.AAV4.01A | 0.392326253 | 0.6460427 |
| TCGA.G3.AAV5.01A | 0.456684681 | 0.7152864 |
| TCGA.G3.AAV6.01A | 0.402072532 | 0.6285859 |
| TCGA.G3.AAV7.01A | 0.409434255 | 0.6364029 |
| TCGA.GJ.A3OU.01A | 0.292243941 | 0.6600596 |
| TCGA.GJ.A6C0.01A | 0.366663842 | 0.5573975 |
| TCGA.GJ.A9DB.01A | 0.329617519 | 0.5686128 |
| TCGA.HP.A5MZ.01A | 0.270255574 | 0.6037752 |
| TCGA.HP.A5N0.01A | 0.276216557 | 0.6133456 |
| TCGA.K7.A5RF.01A | 0.278350975 | 0.6384758 |
| TCGA.K7.A5RG.01A | 0.400378942 | 0.4970109 |
| TCGA.K7.A6G5.01A | 0.35687489  | 0.6831146 |
| TCGA.K7.AAU7.01A | 0.262504471 | 0.4770926 |
| TCGA.KR.A7K0.01A | 0.299155846 | 0.4888581 |
| TCGA.KR.A7K2.01A | 0.33519873  | 0.4859627 |
| TCGA.KR.A7K7.01A | 0.480736215 | 0.6274042 |
| TCGA.KR.A7K8.01A | 0.356514765 | 0.6781085 |
| TCGA.LG.A6GG.01A | 0.374384152 | 0.5542329 |
| TCGA.LG.A9QC.01A | 0.349269982 | 0.7185978 |
| TCGA.LG.A9QD.01A | 0.352649055 | 0.5692721 |
| TCGA.MI.A75C.01A | 0.452561506 | 0.6655109 |
| TCGA.MI.A75E.01A | 0.341760363 | 0.6844671 |
| TCGA.MI.A75G.01A | 0.397396459 | 0.5678613 |
| TCGA.MI.A75H.01A | 0.378783541 | 0.6728029 |
| TCGA.MI.A75I.01A | 0.425210142 | 0.613705  |
| TCGA.MR.A520.01A | 0.360867091 | 0.6654485 |
| TCGA.MR.A8JO.01A | 0.233304077 | 0.5624606 |
| TCGA.NI.A4U2.01A | 0.347909823 | 0.5436514 |
| TCGA.NI.A8LF.01A | 0.280371166 | 0.6289511 |
| TCGA.O8.A75V.01A | 0.361047226 | 0.6493412 |
| TCGA.PD.A5DF.01A | 0.330034824 | 0.6580602 |
| TCGA.QA.A7B7.01A | 0.490004345 | 0.5926191 |
| TCGA.RC.A6M3.01A | 0.482410159 | 0.6735867 |
| TCGA.RC.A6M4.01A | 0.426913936 | 0.6463146 |
| TCGA.RC.A6M5.01A | 0.240609072 | 0.5987204 |
| TCGA.RC.A6M6.01A | 0.420895875 | 0.9478249 |
| TCGA.RC.A7S9.01A | 0.43852242  | 0.3938508 |
| TCGA.RC.A7SB.01A | 0.383446766 | 0.7393782 |
| TCGA.RC.A7SF.01A | 0.363763802 | 0.5081269 |

|                  |             |           |
|------------------|-------------|-----------|
| TCGA.RC.A7SH.01A | 0.407888066 | 0.5111912 |
| TCGA.RC.A7SK.01A | 0.390480219 | 0.7869953 |
| TCGA.RG.A7D4.01A | 0.494866752 | 0.6141403 |
| TCGA.UB.A7MA.01A | 0.343807827 | 0.6281047 |
| TCGA.UB.A7MB.01A | 0.451732963 | 0.5508755 |
| TCGA.UB.A7MC.01A | 0.432233362 | 0.5011966 |
| TCGA.UB.A7MD.01A | 0.338971176 | 0.6303257 |
| TCGA.UB.A7ME.01A | 0.369710049 | 0.5563016 |
| TCGA.UB.A7MF.01A | 0.433116143 | 0.4719438 |
| TCGA.UB.AA0U.01A | 0.342683157 | 0.5412653 |
| TCGA.UB.AA0V.01A | 0.268808511 | 0.5525878 |
| TCGA.WJ.A86L.01A | 0.384842502 | 0.5679349 |
| TCGA.WQ.A9G7.01A | 0.433125085 | 0.4889908 |
| TCGA.WQ.AB4B.01A | 0.364400792 | 0.6805573 |
| TCGA.WX.AA44.01A | 0.34577802  | 0.5210923 |
| TCGA.WX.AA46.01A | 0.3312014   | 0.5194283 |
| TCGA.WX.AA47.01A | 0.423841758 | 0.4772703 |
| TCGA.XR.A8TC.01A | 0.411732188 | 0.6714204 |
| TCGA.XR.A8TD.01A | 0.340036774 | 0.7481323 |
| TCGA.XR.A8TE.01A | 0.275569579 | 0.6639444 |
| TCGA.XR.A8TF.01A | 0.44778585  | 0.5597489 |
| TCGA.XR.A8TG.01A | 0.337954481 | 0.5402404 |
| TCGA.YA.A8S7.01A | 0.305093689 | 0.6119264 |
| TCGA.ZP.A9CV.01A | 0.369955393 | 0.5348249 |
| TCGA.ZP.A9CY.01A | 0.306328798 | 0.5628491 |
| TCGA.ZP.A9CZ.01A | 0.43114296  | 0.5510082 |
| TCGA.ZP.A9D0.01A | 0.372313002 | 0.4387602 |
| TCGA.ZP.A9D1.01A | 0.315447381 | 0.6527536 |
| TCGA.ZP.A9D2.01A | 0.325387294 | 0.5681305 |
| TCGA.ZP.A9D4.01A | 0.396879413 | 0.5564343 |
| TCGA.ZS.A9CD.01A | 0.326130795 | 0.6223145 |
| TCGA.ZS.A9CE.01A | 0.42123616  | 0.7046985 |
| TCGA.ZS.A9CF.01A | 0.394743071 | 0.5888328 |
| TCGA.ZS.A9CG.01A | 0.301896012 | 0.7299359 |
