# Supplementary material for: Identification and Validation of a Potential Stemness-Associated Biomarker in Hepatocellular Carcinoma
Source: Hindawi journal article supplement (doi:10.1155/2022/1534593), 2022-07-11
Supplement: f1 [file 1534593.f1.zip]

Table S5. 112 genes involved in PPI (MM&gt;0.8;GS&gt;0.2)

| probes   | module | Colo GS.mRNAs | MMblue    |
|----------|--------|---------------|-----------|
| BIRC5    | blue   | 0.5480794     | 0.8394893 |
| CDC20    | blue   | 0.5183242     | 0.8585693 |
| CDT1     | blue   | 0.5078634     | 0.8145862 |
| CDCA3    | blue   | 0.5000184     | 0.854155  |
| CENPM    | blue   | 0.4965139     | 0.8145303 |
| CDCA5    | blue   | 0.4957087     | 0.8764555 |
| AURKB    | blue   | 0.4952912     | 0.8247067 |
| SKA1     | blue   | 0.4932935     | 0.8542025 |
| KIF2C    | blue   | 0.4863578     | 0.8988066 |
| CCNB1    | blue   | 0.4830228     | 0.8770345 |
| KIAA0101 | blue   | 0.4821823     | 0.8316257 |
| CDKN3    | blue   | 0.477883      | 0.8116518 |
| SPC25    | blue   | 0.4727587     | 0.8672233 |
| TROAP    | blue   | 0.4724648     | 0.87374   |
| CDC25A   | blue   | 0.4722976     | 0.834748  |
| RRM2     | blue   | 0.4712341     | 0.8407224 |
| SGOL1    | blue   | 0.4682513     | 0.8741676 |
| SKA3     | blue   | 0.4671768     | 0.8615604 |
| KIFC1    | blue   | 0.4654692     | 0.880652  |
| NCAPG    | blue   | 0.4645724     | 0.8887634 |
| EXO1     | blue   | 0.4643559     | 0.8715783 |
| MYBL2    | blue   | 0.4629405     | 0.8873049 |
| NDC80    | blue   | 0.4602471     | 0.8722108 |
| CENPA    | blue   | 0.4569154     | 0.8887041 |
| CDC45    | blue   | 0.4523283     | 0.85788   |
| EME1     | blue   | 0.4515794     | 0.8662482 |
| ZWINT    | blue   | 0.4507242     | 0.8650088 |
| UBE2C    | blue   | 0.4474032     | 0.8371126 |
| CCNB2    | blue   | 0.446908      | 0.8796941 |
| NUF2     | blue   | 0.4451898     | 0.8854652 |
| OIP5     | blue   | 0.4450036     | 0.8367603 |
| HJURP    | blue   | 0.4439909     | 0.8920543 |
| KIF4A    | blue   | 0.4436071     | 0.9019217 |
| TTK      | blue   | 0.4430629     | 0.8891404 |
| NEK2     | blue   | 0.4415302     | 0.8622565 |
| CDC6     | blue   | 0.4223794     | 0.8877682 |
| DEPDC1   | blue   | 0.419818      | 0.8542489 |
| TPX2     | blue   | 0.419345      | 0.9013895 |
| CDCA8    | blue   | 0.4167391     | 0.9020832 |
| RAD51    | blue   | 0.4112464     | 0.870926  |
| ERCC6L   | blue   | 0.4104088     | 0.8809704 |
| CDK1     | blue   | 0.4067001     | 0.897214  |
| TRIP13   | blue   | 0.4064487     | 0.8854838 |
| ASF1B    | blue   | 0.4063477     | 0.8600731 |
| ORC1     | blue   | 0.4053694     | 0.85957   |
| MCM10    | blue   | 0.4040477     | 0.8934246 |
| GINS1    | blue   | 0.4014923     | 0.9100197 |
| DTL      | blue   | 0.3992964     | 0.8405885 |
| MCM2     | blue   | 0.3986514     | 0.8610663 |
| MELK     | blue   | 0.3980079     | 0.8673826 |
| PLK1     | blue   | 0.3951205     | 0.9116508 |
| TICRR    | blue   | 0.394909      | 0.9178393 |
| ASPM     | blue   | 0.3945547     | 0.8132015 |
| CDCA2    | blue   | 0.3938097     | 0.8839586 |
| PBK      | blue   | 0.3895847     | 0.8128604 |
| MTFR2    | blue   | 0.3893037     | 0.8542855 |
| E2F2     | blue   | 0.3832449     | 0.8575272 |
| WDR62    | blue   | 0.3820656     | 0.8960656 |
| KIF18B   | blue   | 0.3790854     | 0.9249901 |

|              |      |           |           |
|--------------|------|-----------|-----------|
| WDR76        | blue | 0.3753103 | 0.8045179 |
| PRR11        | blue | 0.3752499 | 0.894019  |
| BUB1         | blue | 0.3705505 | 0.8971739 |
| DLGAP5       | blue | 0.3662905 | 0.8861859 |
| CCNA2        | blue | 0.3649772 | 0.8205757 |
| KIF20A       | blue | 0.3639928 | 0.8757231 |
| FANCD2       | blue | 0.3617517 | 0.9114327 |
| TOP2A        | blue | 0.3608042 | 0.9035872 |
| XRCC2        | blue | 0.3594296 | 0.8871873 |
| RAD54L       | blue | 0.3587781 | 0.8798465 |
| PKMYT1       | blue | 0.358288  | 0.8166639 |
| CKAP2L       | blue | 0.3526731 | 0.8833491 |
| TCF19        | blue | 0.3517367 | 0.8118379 |
| PARPBP       | blue | 0.3514563 | 0.8586647 |
| KIF11        | blue | 0.3502449 | 0.9110701 |
| LMNB1        | blue | 0.3501521 | 0.8827198 |
| CHAF1B       | blue | 0.3481398 | 0.8701264 |
| ORC6         | blue | 0.3454413 | 0.8711912 |
| MKI67        | blue | 0.3408996 | 0.8913147 |
| PIF1         | blue | 0.3401501 | 0.8715707 |
| KIF18A       | blue | 0.3374331 | 0.9021702 |
| KIF15        | blue | 0.3333868 | 0.8657131 |
| POLQ         | blue | 0.3321308 | 0.8954463 |
| NCAPH        | blue | 0.3315372 | 0.8974166 |
| BUB1B        | blue | 0.3312897 | 0.9152923 |
| HELLS        | blue | 0.3312823 | 0.8760019 |
| PRC1         | blue | 0.326967  | 0.8924303 |
| ARHGAP11A    | blue | 0.3226007 | 0.8910937 |
| FOXM1        | blue | 0.3196495 | 0.8771105 |
| CENPF        | blue | 0.3159993 | 0.8840696 |
| E2F8         | blue | 0.3155013 | 0.8321525 |
| CENPI        | blue | 0.3122181 | 0.8745855 |
| GTSE1        | blue | 0.3009239 | 0.9165557 |
| DEPDC1B      | blue | 0.2954254 | 0.8856735 |
| RAD51AP1     | blue | 0.2933366 | 0.8408958 |
| CENPE        | blue | 0.2915748 | 0.8853194 |
| ANLN         | blue | 0.290399  | 0.8934952 |
| KIF23        | blue | 0.2895674 | 0.9315059 |
| CENPK        | blue | 0.2803071 | 0.8548599 |
| FAM72B       | blue | 0.2703683 | 0.8472311 |
| UHRF1        | blue | 0.2696845 | 0.8778091 |
| CIT          | blue | 0.2688118 | 0.8227112 |
| BLM          | blue | 0.2655536 | 0.847759  |
| CEP55        | blue | 0.2646388 | 0.9137114 |
| RTKN2        | blue | 0.2630749 | 0.8124793 |
| GSG2         | blue | 0.2611261 | 0.8592712 |
| SHCBP1       | blue | 0.2574886 | 0.8416169 |
| KIF14        | blue | 0.2513517 | 0.8440993 |
| KIAA1524     | blue | 0.2499835 | 0.9110972 |
| KNTC1        | blue | 0.2493351 | 0.8603241 |
| STIL         | blue | 0.2418659 | 0.883556  |
| CLSPN        | blue | 0.2117496 | 0.8349336 |
| CTD-2510F5.4 | blue | 0.2017597 | 0.8282996 |
