# Supplementary material for: Identification and Validation of a Potential Stemness-Associated Biomarker in Hepatocellular Carcinoma
Source: Hindawi journal article supplement (doi:10.1155/2022/1534593), 2022-07-11
Supplement: f1 [file 1534593.f1.zip]

Table S6. The result of MCODE method in Cytoscape.

| MCODE::Clusters (1) | MCODE::Node | MCODE::Score | name     | shared name |
|---------------------|-------------|--------------|----------|-------------|
| Cluster 0           | Clustered   | 63.407984    | BUB1     | BUB1        |
|                     | Unclustered | 0            | RTKN2    | RTKN2       |
|                     | Unclustered | 4            | WDR76    | WDR76       |
|                     | Unclustered | 15.625731    | EME1     | EME1        |
|                     | Unclustered | 7            | XRCC2    | XRCC2       |
|                     | Unclustered | 25           | E2F2     | E2F2        |
|                     | Unclustered | 9            | WDR62    | WDR62       |
|                     | Unclustered | 36.950067    | MTFR2    | MTFR2       |
|                     | Unclustered | 45.165457    | FANCD2   | FANCD2      |
|                     | Unclustered | 46.503771    | CHAF1B   | CHAF1B      |
| Cluster 0           | Clustered   | 58.65124     | UHRF1    | UHRF1       |
| Cluster 0           | Clustered   | 56.040865    | ORC1     | ORC1        |
|                     | Unclustered | 41.702866    | BLM      | BLM         |
|                     | Unclustered | 17           | PIF1     | PIF1        |
| Cluster 0           | Clustered   | 52.551119    | PKMYT1   | PKMYT1      |
|                     | Unclustered | 35.841414    | ORC6     | ORC6        |
| Cluster 0           | Clustered   | 59.104895    | CENPM    | CENPM       |
| Cluster 0           | Clustered   | 59.43609     | ASF1B    | ASF1B       |
| Cluster 0           | Clustered   | 56.756177    | E2F8     | E2F8        |
| Cluster 0           | Clustered   | 61.074627    | KIF18B   | KIF18B      |
|                     | Unclustered | 34.963455    | TCF19    | TCF19       |
| Cluster 0           | Clustered   | 58.382294    | RAD51    | RAD51       |
|                     | Unclustered | 13           | FAM72B   | FAM72B      |
|                     | Unclustered | 32.944538    | GSG2     | GSG2        |
| Cluster 0           | Clustered   | 52.519056    | CLSPN    | CLSPN       |
|                     | Unclustered | 30.941288    | KIAA1524 | KIAA1524    |
| Cluster 0           | Clustered   | 59.025461    | SPC25    | SPC25       |
| Cluster 0           | Clustered   | 58.385417    | SGOL1    | SGOL1       |
|                     | Unclustered | 50.377578    | GIN51    | GIN51       |
|                     | Unclustered | 37.452935    | PRR11    | PRR11       |
| Cluster 0           | Clustered   | 59.28169     | TROAP    | TROAP       |
| Cluster 0           | Clustered   | 63.407984    | KIF20A   | KIF20A      |
| Cluster 0           | Clustered   | 63.407984    | CEP55    | CEP55       |
| Cluster 0           | Clustered   | 63.407984    | ASPM     | ASPM        |
| Cluster 0           | Clustered   | 63.407984    | CDK1     | CDK1        |
|                     | Unclustered | 23.794872    | CIT      | CIT         |
| Cluster 0           | Clustered   | 63.407984    | TOP2A    | TOP2A       |
| Cluster 0           | Clustered   | 63.407984    | CENPF    | CENPF       |
| Cluster 0           | Clustered   | 59.499658    | KIF14    | KIF14       |
| Cluster 0           | Clustered   | 63.407984    | KIF4A    | KIF4A       |
| Cluster 0           | Clustered   | 62.575758    | PRC1     | PRC1        |
| Cluster 0           | Clustered   | 63.407984    | TPX2     | TPX2        |
| Cluster 0           | Clustered   | 63.407984    | PBK      | PBK         |
| Cluster 0           | Clustered   | 63.407984    | AURKB    | AURKB       |
| Cluster 0           | Clustered   | 63.407984    | KIF2C    | KIF2C       |
| Cluster 0           | Clustered   | 63.407984    | MELK     | MELK        |
| Cluster 0           | Clustered   | 63.407984    | CCNA2    | CCNA2       |
| Cluster 0           | Clustered   | 63.407984    | CDCA8    | CDCA8       |
| Cluster 0           | Clustered   | 63.407984    | CCNB2    | CCNB2       |
| Cluster 0           | Clustered   | 63.604396    | PLK1     | PLK1        |
| Cluster 0           | Clustered   | 63.407984    | CDC20    | CDC20       |
| Cluster 0           | Clustered   | 63.407984    | UBE2C    | UBE2C       |
| Cluster 0           | Clustered   | 63.407984    | TTK      | TTK         |
| Cluster 0           | Clustered   | 62.619048    | NEK2     | NEK2        |
| Cluster 0           | Clustered   | 63.407984    | RRM2     | RRM2        |
| Cluster 0           | Clustered   | 63.407984    | BUB1B    | BUB1B       |
| Cluster 0           | Clustered   | 63.407984    | KIF15    | KIF15       |
| Cluster 0           | Clustered   | 63.407984    | NUF2     | NUF2        |
| Cluster 0           | Clustered   | 63.407984    | BIRC5    | BIRC5       |

|           |             |           |          |           |
|-----------|-------------|-----------|----------|-----------|
| Cluster 0 | Clustered   | 61.768968 | SHCBP1   | SHCBP1    |
| Cluster 0 | Clustered   | 62.532468 | CENPA    | CENPA     |
| Cluster 0 | Clustered   | 63.407984 | EXO1     | EXO1      |
| Cluster 0 | Clustered   | 63.604396 | HJURP    | HJURP     |
| Cluster 0 | Clustered   | 61.203999 | CDKN3    | CDKN3     |
| Cluster 0 | Clustered   | 59.715789 | DEPDC1   | DEPDC1    |
| Cluster 0 | Clustered   | 63.985263 | FOXM1    | FOXM1     |
| Cluster 0 | Clustered   | 63.407984 | MKI67    | MKI67     |
| Cluster 0 | Clustered   | 62.016577 | DTL      | DTL       |
| Cluster 0 | Clustered   | 54.707692 | CENPK    | CENPK     |
| Cluster 0 | Clustered   | 58.968792 | CKAP2L   | CKAP2L    |
| Cluster 0 | Clustered   | 63.985263 | ZWINT    | ZWINT     |
| Cluster 0 | Clustered   | 63.407984 | CDC45    | CDC45     |
| Cluster 0 | Seed        | 63.985263 | CDCA2    | CDCA2     |
| Cluster 0 | Clustered   | 63.407984 | CDCA5    | CDCA5     |
| Cluster 0 | Clustered   | 58.900256 | ARHGAP11 | ARHGAP11A |
| Cluster 0 | Clustered   | 61.725222 | KIAA0101 | KIAA0101  |
| Cluster 0 | Clustered   | 61.844211 | KNTC1    | KNTC1     |
| Cluster 0 | Clustered   | 57.601405 | HELLS    | HELLS     |
| Cluster 0 | Clustered   | 62.822967 | SKA3     | SKA3      |
| Cluster 0 | Clustered   | 61.506494 | RAD54L   | RAD54L    |
| Cluster 0 | Clustered   | 58.735733 | ERCC6L   | ERCC6L    |
| Cluster 0 | Clustered   | 63.81203  | MCM10    | MCM10     |
| Cluster 0 | Clustered   | 61.852174 | KIFC1    | KIFC1     |
| Cluster 0 | Clustered   | 54        | STIL     | STIL      |
| Cluster 0 | Clustered   | 59.003805 | SKA1     | SKA1      |
| Cluster 0 | Clustered   | 52.044262 | PARPBP   | PARPBP    |
| Cluster 0 | Clustered   | 60.520344 | CDCA3    | CDCA3     |
| Cluster 0 | Clustered   | 60.701053 | GTSE1    | GTSE1     |
| Cluster 0 | Clustered   | 52.551119 | TICRR    | TICRR     |
| Cluster 0 | Clustered   | 57.191346 | CDC25A   | CDC25A    |
| Cluster 0 | Clustered   | 60.969309 | CDT1     | CDT1      |
| Cluster 0 | Clustered   | 55.111111 | CENPI    | CENPI     |
| Cluster 0 | Clustered   | 63.407984 | CENPE    | CENPE     |
| Cluster 0 | Clustered   | 59.982441 | MCM2     | MCM2      |
| Cluster 0 | Clustered   | 59        | DEPDC1B  | DEPDC1B   |
| Cluster 0 | Clustered   | 52.91486  | POLQ     | POLQ      |
| Cluster 0 | Clustered   | 59.096651 | KIF18A   | KIF18A    |
| Cluster 0 | Clustered   | 63.407984 | NDC80    | NDC80     |
|           | Unclustered | 49.84917  | LMNB1    | LMNB1     |
| Cluster 0 | Clustered   | 63.407984 | KIF11    | KIF11     |
| Cluster 0 | Clustered   | 63.81203  | KIF23    | KIF23     |
| Cluster 0 | Clustered   | 63.407984 | CCNB1    | CCNB1     |
| Cluster 0 | Clustered   | 63.407984 | NCAPG    | NCAPG     |
| Cluster 0 | Clustered   | 63.407984 | DLGAP5   | DLGAP5    |
| Cluster 0 | Clustered   | 63.407984 | NCAPH    | NCAPH     |
| Cluster 0 | Clustered   | 61.195716 | RAD51AP1 | RAD51AP1  |
| Cluster 0 | Clustered   | 61.656338 | OIP5     | OIP5      |
| Cluster 0 | Clustered   | 59.355332 | MYBL2    | MYBL2     |
| Cluster 0 | Clustered   | 62.320675 | CDC6     | CDC6      |
| Cluster 0 | Clustered   | 62.532468 | TRIP13   | TRIP13    |
| Cluster 0 | Clustered   | 60.652716 | ANLN     | ANLN      |
