# Supplementary material for: Identification and Validation of a Potential Stemness-Associated Biomarker in Hepatocellular Carcinoma
Source: Hindawi journal article supplement (doi:10.1155/2022/1534593), 2022-07-11
Supplement: f1 [file 1534593.f1.zip]

Table S7. The 'stemness' signature in MSigDB: genes up-regulated and common to 6 human embryonic stem cell lines

ARL5B  
AURKB  
BRIX1  
CACHD1  
CALU  
CCNB1  
CCNC  
CCT8  
CDK1  
CRABP1  
CYP26A1  
DDX21  
DSG2  
DTL  
EIF4A1  
ELOVL6  
EPRS1  
FABP5  
FAM83D  
GAL  
GDF3  
GJA1  
GNL3  
GSX1  
HDAC2  
HMGA1  
HMGB2  
HNRNPAB  
HSPA4  
IDH1  
IFITM1  
IGF2BP2  
IMPDH2  
JADE1  
KIF4A  
KPNA2  
KRT8  
LDHB  
LIN28A  
LRRN1  
MAD2L2  
MGST1  
MTHFD1  
MTHFD2  
NANOG  
NASP  
NME2  
NPM1  
OR7E33P  
PITX2  
PODXL  
POU5F1  
PSIP1  
PSMA2  
PSMA3  
PTTG1  
RCC2  
RPL24  
RPL4  
RPL6

RPL7  
RPLP0  
RPS24  
RPSAP44  
RSL24D1  
SEMA6A  
SEPHS1  
SERPINH1  
SET  
SFRP2  
SLC16A1  
SMS  
SNRPF  
SRSF7  
SSB  
TDGF1  
TK1  
TNNC2  
TNNT1  
TPX2  
TUBB  
TUBB6  
ZNF257  
ZNF43

ies tested.
