# Supplementary material for: Identification and Validation of a Potential Stemness-Associated Biomarker in Hepatocellular Carcinoma
Source: Hindawi journal article supplement (doi:10.1155/2022/1534593), 2022-07-11

**A**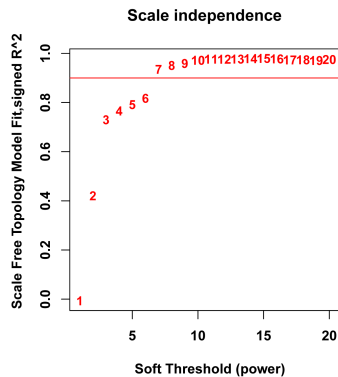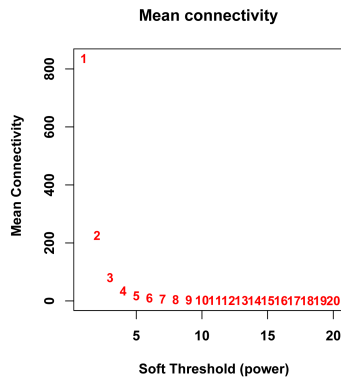**B****Histogram of k**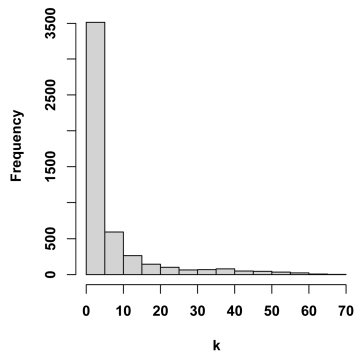**C**

**Check Scale free topology**  
 $\text{scale } R^2 = 0.94$ , slope =  $-1.56$

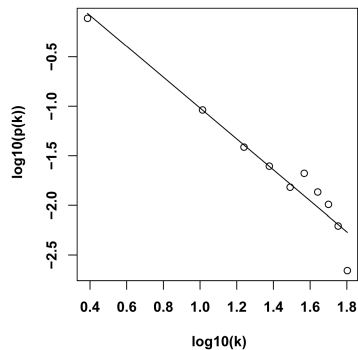**D**

**Module membership vs. gene significance**  
 $\text{cor} = 0.61$ ,  $p = 3e-143$

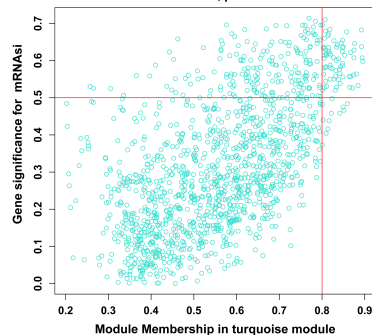

Supplement: f1 [file 1534593.f1.zip]
