# Supplementary figures and images for: Identification and Validation of a Potential Stemness-Associated Biomarker in Hepatocellular Carcinoma
Source: Hindawi journal article supplement (doi:10.1155/2022/1534593), 2022-07-11

**A** TCGA cohort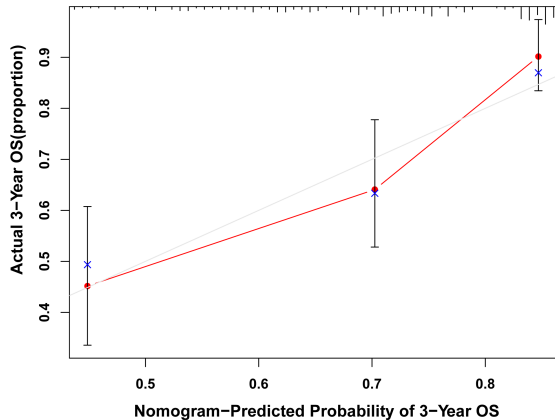**B** ICGC cohort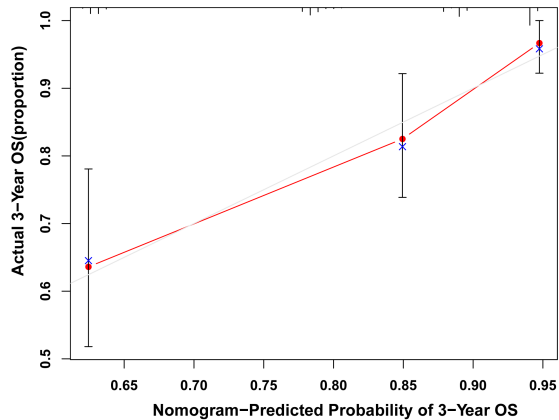

Supplement: f1 [file 1534593.f1.zip]

**A**

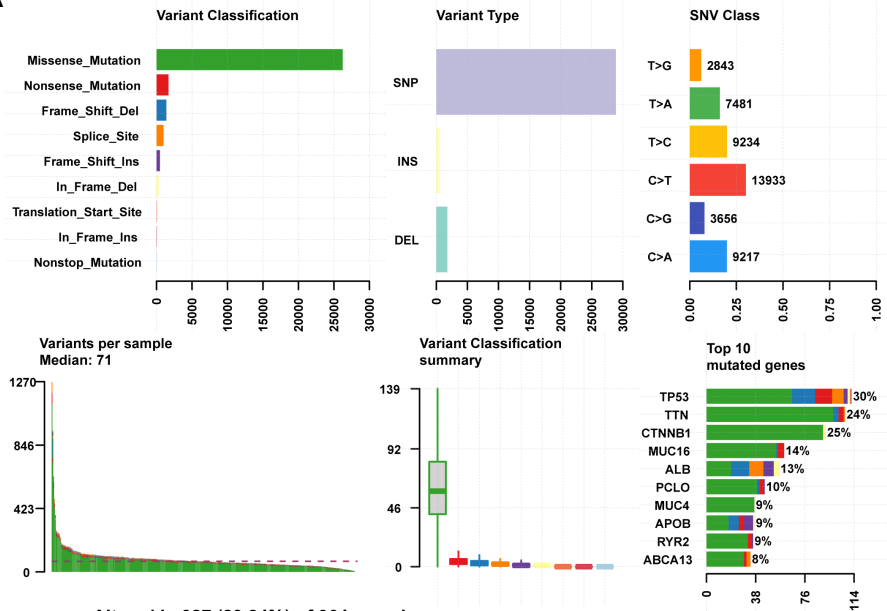

Altered in 327 (89.84%) of 364 samples.

**B**

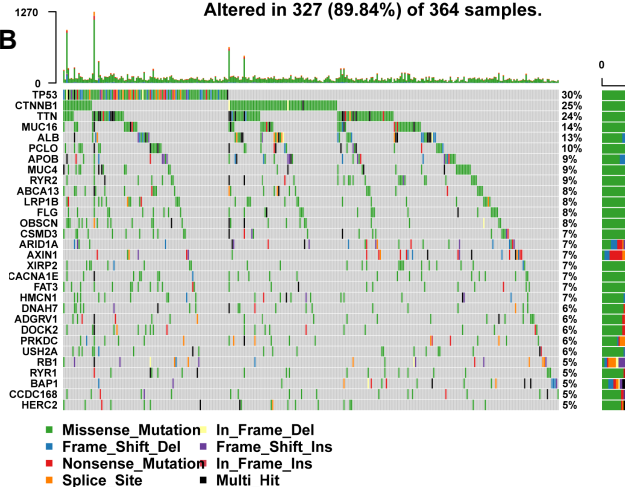

**C**

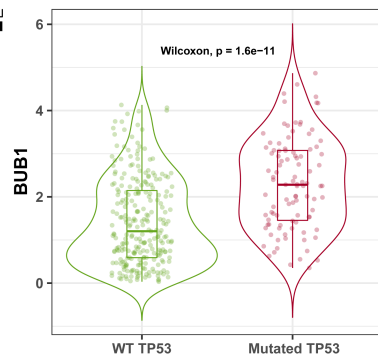

Supplement: f1 [file 1534593.f1.zip]

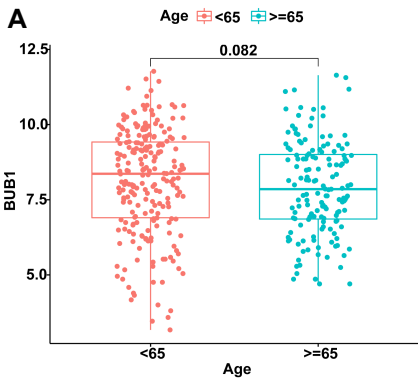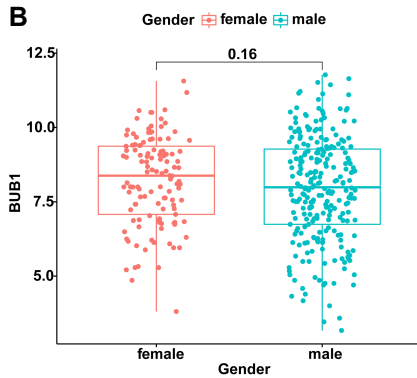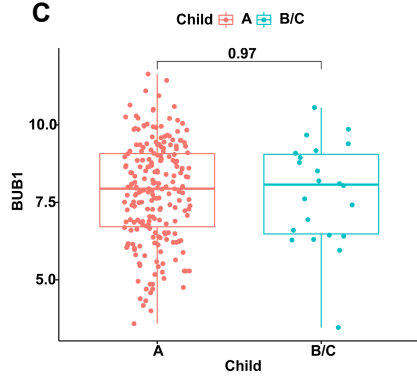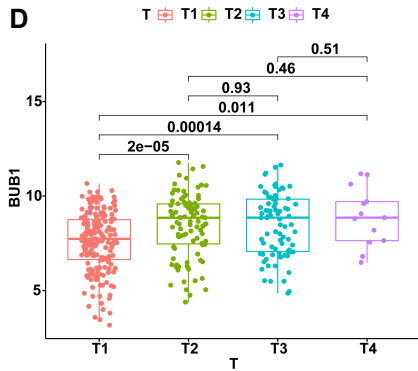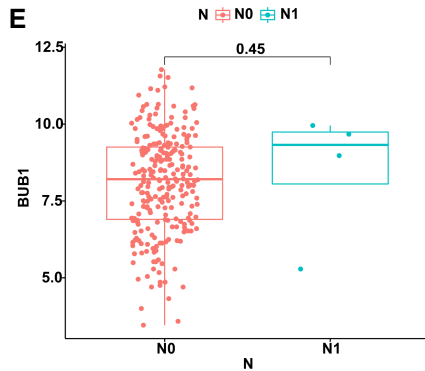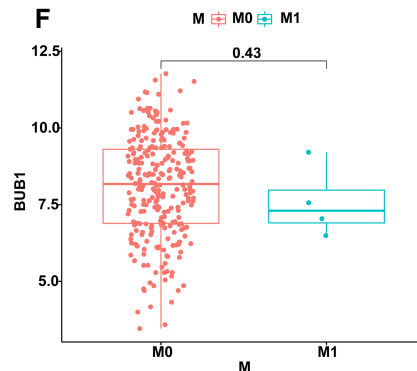

Supplement: f1 [file 1534593.f1.zip]
